Extra days needed to write an English paper compared to native English speakers

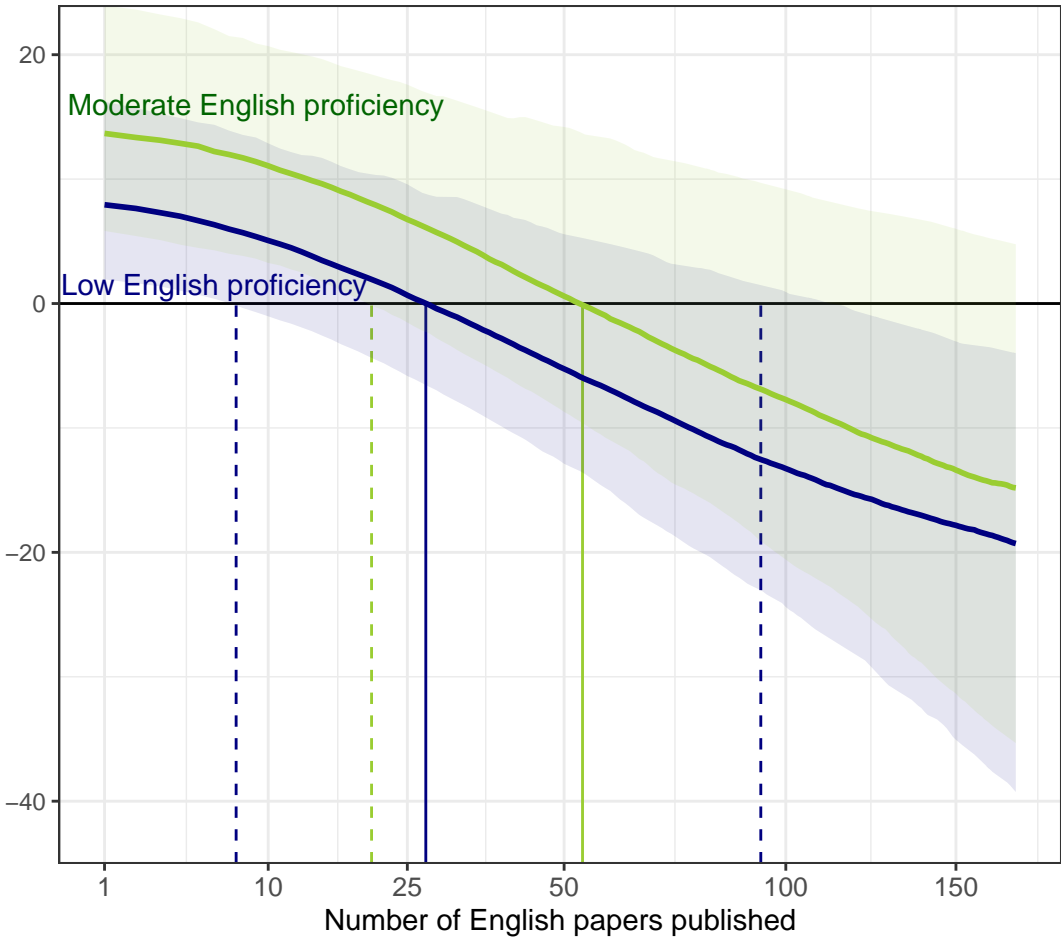

Source: https://ndownloader.figstatic.com/institutions/plos/files_by_doi/10.1371/journal.pbio.3002184
