**Low proficiency  
(median = 7.75 years)**

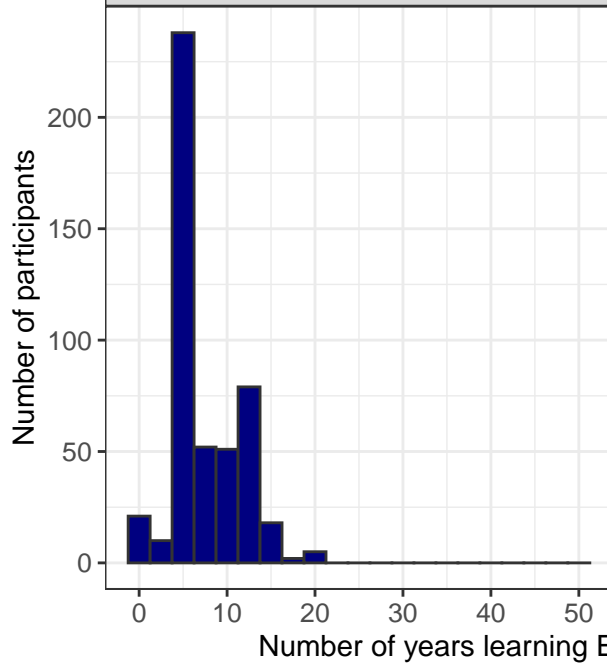

**Moderate proficiency  
(median = 6.24 years)**

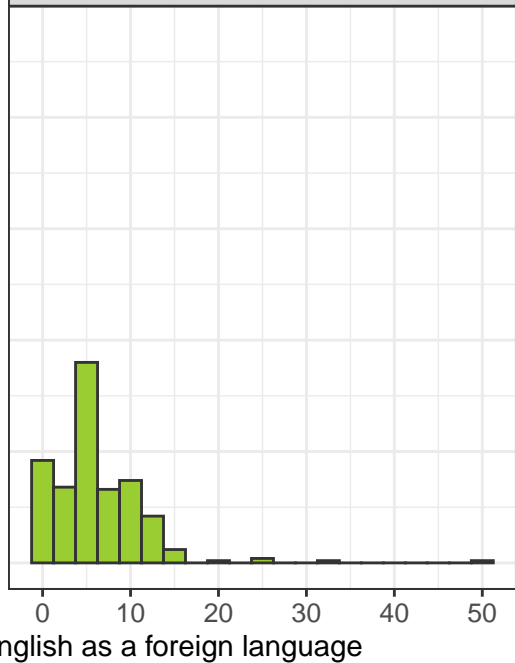

Source: https://ndownloader.figstatic.com/institutions/plos/files_by_doi/10.1371/journal.pbio.3002184
