**Low proficiency  
(median = 1.08 years)**

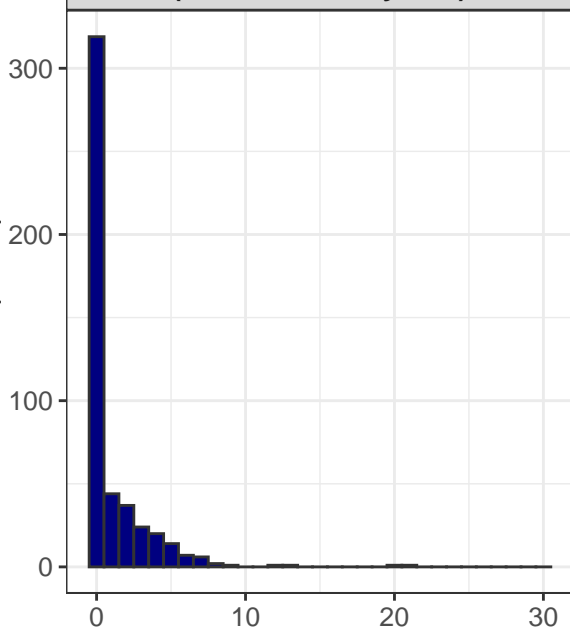

**Moderate proficiency  
(median = 1.72 years)**

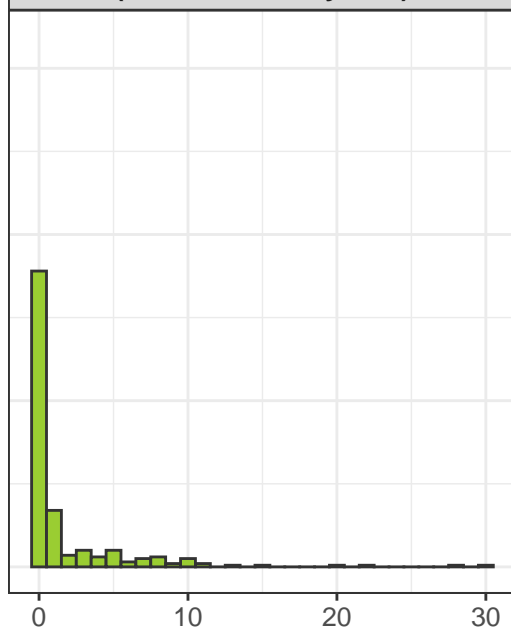

Number of years lived/living in English-speaking country
