# Supplementary material for: The manifold costs of being a non-native English speaker in science
Source: PubMed Central journal article supplement (PMC10353817; doi:10.1371/journal.pbio.3002184), 2023-07-18

Extra minutes needed to read an English paper compared to native English speakers

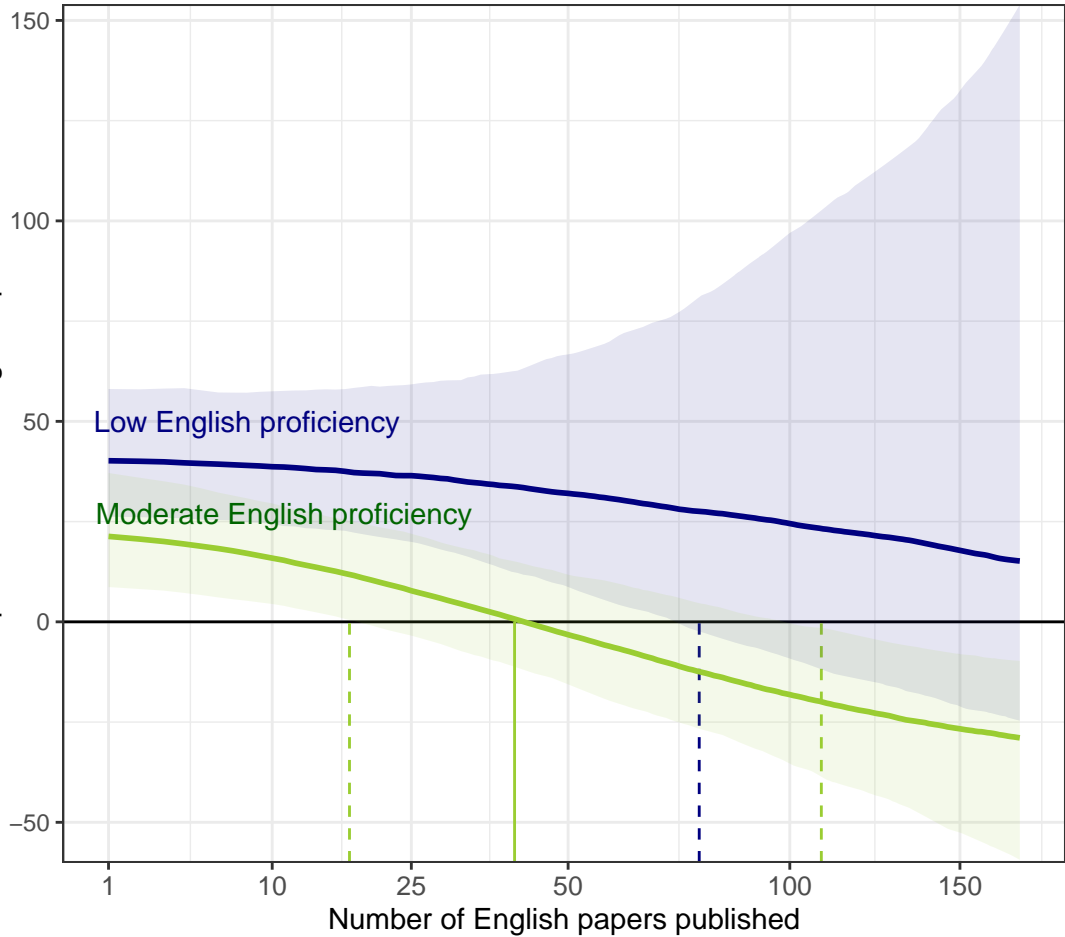

Supplement: pbio.3002184.s018.pdf [file pbio.3002184.s018.pdf]
