# Supplementary material for: The manifold costs of being a non-native English speaker in science
Source: PubMed Central journal article supplement (PMC10353817; doi:10.1371/journal.pbio.3002184), 2023-07-18

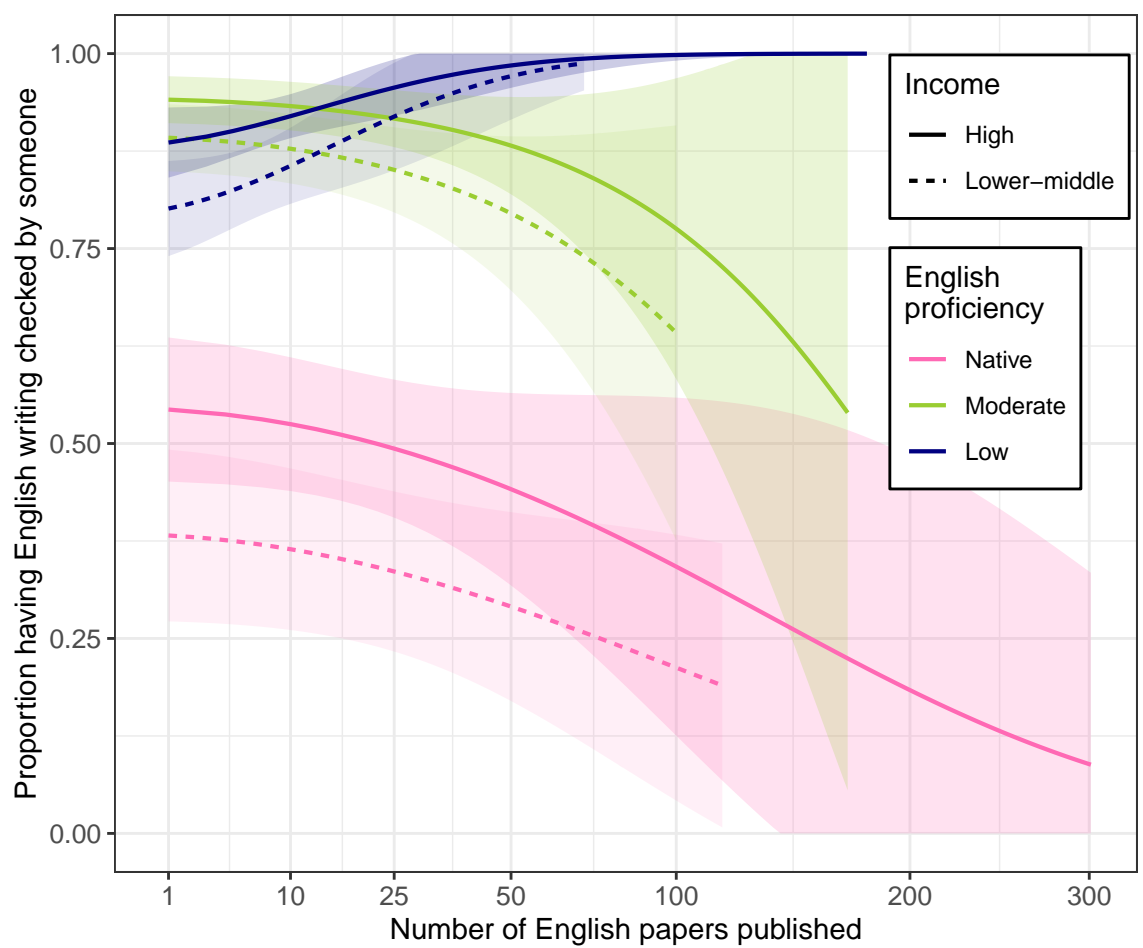

Supplement: pbio.3002184.s020.pdf [file pbio.3002184.s020.pdf]
