# Supplementary material for: The manifold costs of being a non-native English speaker in science
Source: PubMed Central journal article supplement (PMC10353817; doi:10.1371/journal.pbio.3002184), 2023-07-18

Extra hours needed to prepare an English presentation compared to native English speakers

Moderate English proficiency

Low English proficiency

1 10 25 50 100 150

Number of English papers published

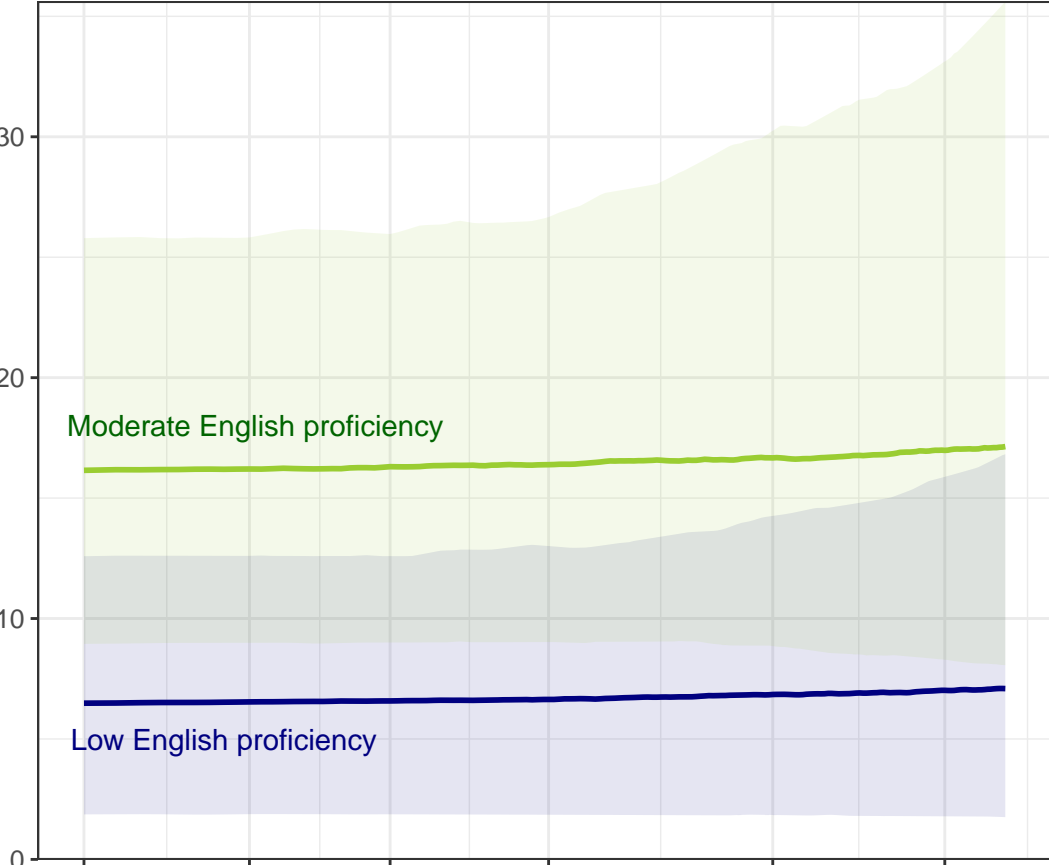

Supplement: pbio.3002184.s022.pdf [file pbio.3002184.s022.pdf]
